# Supplementary material
Source: PubMed Central journal article supplement (PMC5561899)
Supplement: blood762336-suppl1.pdf [file blood762336-suppl1.pdf]

**Table S1. Demographics and disease characteristics of infants enrolled in AAML03P1 or AAML0531, combined**

| Characteristic (if known)         | All Infants |      | Infants Age 0–179 d |      | Infants Age 180–364 d |      | P     |
|-----------------------------------|-------------|------|---------------------|------|-----------------------|------|-------|
|                                   | N           | %    | N                   | %    | N                     | %    |       |
| Study                             |             |      |                     |      |                       |      |       |
| AAML03P1                          | 39          | 27%  | 21                  | 33%  | 18                    | 23%  | 0.196 |
| AAML0531                          | 103         | 73%  | 43                  | 67%  | 60                    | 77%  |       |
| Gender                            |             |      |                     |      |                       |      |       |
| Male                              | 70          | 49%  | 32                  | 50%  | 38                    | 49%  | 0.879 |
| Female                            | 72          | 51%  | 32                  | 50%  | 40                    | 51%  |       |
| Race                              |             |      |                     |      |                       |      |       |
| American Indian or Alaskan Native | 0           | 0%   | 0                   | 0%   | 0                     | 0%   | 1.000 |
| Asian                             | 1           | 1%   | 0                   | 0%   | 1                     | 1%   | 1.000 |
| Pacific Islander                  | 0           | 0%   | 0                   | 0%   | 0                     | 0%   | 1.000 |
| Black or African American         | 14          | 10%  | 5                   | 8%   | 9                     | 12%  | 0.500 |
| White                             | 112         | 79%  | 51                  | 80%  | 61                    | 78%  | 0.428 |
| Other or unknown                  | 15          | 11%  | 8                   | 13%  | 7                     | 9%   | 1.000 |
| FAB group*                        |             |      |                     |      |                       |      |       |
| FAB M0                            | 5           | 4%   | 1                   | 2%   | 4                     | 6%   | 0.379 |
| FAB M1                            | 3           | 3%   | 1                   | 2%   | 2                     | 3%   | 1.000 |
| FAB M2                            | 8           | 7%   | 4                   | 8%   | 4                     | 6%   | 1.000 |
| FAB M4                            | 19          | 17%  | 7                   | 14%  | 12                    | 19%  | 0.439 |
| FAB M5                            | 54          | 48%  | 26                  | 52%  | 28                    | 45%  | 0.564 |
| FAB M6                            | 1           | 1%   | 1                   | 2%   | 0                     | 0%   | 0.451 |
| FAB M7                            | 22          | 20%  | 10                  | 20%  | 12                    | 19%  | 0.969 |
| Cytogenetic group                 |             |      |                     |      |                       |      |       |
| Normal                            | 12          | 8%   | 5                   | 8%   | 7                     | 9%   | 0.859 |
| t(8;21)                           | 0           | 0%   | 0                   | 0%   | 0                     | 0%   | 1.000 |
| inv(16)                           | 4           | 3%   | 1                   | 2%   | 3                     | 4%   | 0.630 |
| 11q23                             | 70          | 49%  | 34                  | 53%  | 36                    | 46%  | 0.260 |
| t(6;9)                            | 0           | 0%   | 0                   | 0%   | 0                     | 0%   | 1.000 |
| Monosomy 7                        | 1           | 1%   | 0                   | 0%   | 1                     | 1%   | 1.000 |
| Del(7q)                           | 6           | 4%   | 2                   | 3%   | 4                     | 5%   | 1.000 |
| Monosomy 5/del5q                  | 1           | 1%   | 0                   | 0%   | 1                     | 1%   | 1.000 |
| Trisomy 8                         | 6           | 4%   | 1                   | 2%   | 5                     | 6%   | 0.228 |
| Other                             | 27          | 19%  | 13                  | 20%  | 14                    | 18%  | 0.633 |
| Unknown                           | 15          | 11%  | 8                   | 13%  | 7                     | 9%   |       |
| FLT3 ITD                          |             |      |                     |      |                       |      |       |
| ITD negative                      | 113         | 100% | 50                  | 100% | 63                    | 100% | 1.000 |
| ITD positive                      | 0           | 0%   | 0                   | 0%   | 0                     | 0%   |       |
| Unknown                           | 29          |      | 14                  |      | 15                    |      |       |
| 12p/ETV6 mutation                 |             |      |                     |      |                       |      |       |
| No                                | 132         | 93%  | 54                  | 96%  | 67                    | 94%  | 0.691 |
| Yes                               | 6           | 4%   | 2                   | 4%   | 4                     | 6%   |       |
| CNS disease                       |             |      |                     |      |                       |      |       |
| CNS1                              | 83          | 60%  | 38                  | 61%  | 45                    | 59%  | 0.804 |
| CNS2 + CNS3                       | 55          | 40%  | 24                  | 39%  | 31                    | 41%  |       |
| Unknown                           | 4           |      | 2                   |      | 2                     |      |       |
| WBC count at diagnosis            |             |      |                     |      |                       |      |       |
| WBC ≤ 100,000                     | 102         | 72%  | 44                  | 69%  | 58                    | 74%  | 0.460 |
| WBC > 100,000                     | 40          | 28%  | 20                  | 31%  | 20                    | 26%  |       |
| Risk group (AAML0531 definition)  |             |      |                     |      |                       |      |       |
| Intermediate                      | 136         | 96%  | 63                  | 98%  | 73                    | 94%  | 0.223 |
| Low                               | 4           | 3%   | 1                   | 2%   | 3                     | 4%   | 0.627 |
| High                              | 2           | 1%   | 0                   | 0%   | 2                     | 3%   | 0.223 |

FAB indicates French-American-British; ITD, internal tandem duplication; CNS, central nervous system; WBC, white blood cell.

\*FAB type was available for 112 patients.

**Table S2. Univariable analyses for EFS and OS from study entry for infants (N = 142)**

| Category               | EFS from study entry |       |           |       | OS from study entry |       |            |       |
|------------------------|----------------------|-------|-----------|-------|---------------------|-------|------------|-------|
|                        | N                    | HR    | 95% CI    | P     | N                   | HR    | 95% CI     | P     |
| Age group              |                      |       |           |       |                     |       |            |       |
| 0–179 d                | 64                   | 0.935 | 0.6–1.46  | 0.768 | 64                  | 0.776 | 0.45–1.35  | 0.367 |
| 180–364 d              | 78                   | 1     |           |       | 78                  | 1     |            |       |
| Treatment              |                      |       |           |       |                     |       |            |       |
| noGO                   | 64                   | 1     |           |       | 64                  | 1     |            |       |
| GO                     | 78                   | 0.747 | 0.48–1.16 | 0.193 | 78                  | 0.714 | 0.42–1.23  | 0.221 |
| 11q23 abnormality      |                      |       |           |       |                     |       |            |       |
| No                     | 56                   | 1     |           |       | 56                  | 1     |            |       |
| Yes                    | 73                   | 1.238 | 0.77–1.99 | 0.377 | 73                  | 0.980 | 0.54–1.77  | 0.946 |
| WBC group              |                      |       |           |       |                     |       |            |       |
| Low ( $\leq 100,000$ ) | 102                  | 1     |           |       | 102                 | 1     |            |       |
| High ( $> 100,000$ )   | 40                   | 1.501 | 0.94–2.39 | 0.086 | 40                  | 1.218 | 0.68–2.17  | 0.504 |
| 12p /ETV6 abnormality  |                      |       |           |       |                     |       |            |       |
| No                     | 121                  | 1     |           |       | 121                 | 1     |            |       |
| Yes                    | 6                    | 1.219 | 0.45–3.34 | 0.701 | 6                   | 0.821 | 0.2–3.39   | 0.785 |
| Risk group             |                      |       |           |       |                     |       |            |       |
| Low risk               | 4                    | 1.074 | 0.34–3.41 | 0.904 | 4                   | –     | –          | 0.986 |
| Intermediate risk      | 136                  | 1     |           |       | 136                 | 1     |            |       |
| High risk              | 2                    | 1.829 | 0.45–7.45 | 0.400 | 2                   | 3.863 | 0.94–15.92 | 0.061 |
| CNS category           |                      |       |           |       |                     |       |            |       |
| CNS1                   | 83                   | 1     |           |       | 83                  | 1     |            |       |
| CNS2 + CNS3            | 55                   | 1.533 | 0.98–2.41 | 0.064 | 55                  | 1.023 | 0.58–1.81  | 0.939 |

EFS indicates event-free survival; OS, overall survival; HR, hazard ratio; CI, confidence interval; GO, gemtuzumab ozogamicin; WBC, white blood cell; CNS, central nervous system.

**Table S3. Multivariable analyses for EFS and OS from study entry for infants (N = 116)**

| Category               | EFS from study entry |       |            |       | OS from study entry |       |           |       |
|------------------------|----------------------|-------|------------|-------|---------------------|-------|-----------|-------|
|                        | N                    | HR    | 95% CI     | P     | N                   | HR    | 95% CI    | P     |
| Age group              |                      |       |            |       |                     |       |           |       |
| 0–179 d                | 51                   | 0.931 | 0.55–1.57  | 0.788 | 51                  | 1.058 | 0.53–2.1  | 0.872 |
| Infant, 180–364 d      | 65                   | 1     |            |       | 65                  | 1     |           |       |
| Treatment              |                      |       |            |       |                     |       |           |       |
| noGO                   | 57                   | 1     |            |       | 57                  | 1     |           |       |
| GO                     | 59                   | 0.676 | 0.4–1.15   | 0.148 | 59                  | 0.502 | 0.25–1.02 | 0.057 |
| 11q23 abnormality      |                      |       |            |       |                     |       |           |       |
| No                     | 45                   | 1     |            |       | 45                  | 1     |           |       |
| Yes                    | 71                   | 1.184 | 0.68–2.08  | 0.556 | 71                  | 0.914 | 0.46–1.84 | 0.802 |
| WBC group              |                      |       |            |       |                     |       |           |       |
| Low ( $\leq 100,000$ ) | 82                   | 1     |            |       | 82                  | 1     |           |       |
| High ( $> 100,000$ )   | 34                   | 1.279 | 0.74–2.2   | 0.375 | 34                  | 1.146 | 0.55–2.4  | 0.718 |
| 12/ETV6 abnormality    |                      |       |            |       |                     |       |           |       |
| No                     | 110                  | 1     |            |       | 110                 | 1     |           |       |
| Yes                    | 6                    | 1.356 | 0.46–3.99  | 0.581 | 6                   | 1.064 | 0.24–4.82 | 0.936 |
| Risk group             |                      |       |            |       |                     |       |           |       |
| Low risk               | 4                    | 1.010 | 0.29–3.52  | 0.988 | 4                   | –     | –         |       |
| Intermediate risk      | 110                  | 1     |            |       | 110                 | 1     |           |       |
| High risk              | 2                    | 2.655 | 0.56–12.62 | 0.220 | 2                   | 7.141 | 1.3–39.38 | 0.024 |
| CNS category           |                      |       |            |       |                     |       |           |       |
| CNS1                   | 67                   | 1     |            |       | 67                  | 1     |           |       |
| CNS2 + CNS3            | 49                   | 1.334 | 0.8–2.22   | 0.268 | 49                  | 0.808 | 0.4–1.63  | 0.549 |

EFS indicates event-free survival; OS, overall survival; HR, hazard ratio; CI, confidence interval; GO, gemtuzumab ozogamicin; WBC, white blood cell; CNS, central nervous system.

**Table S4. Toxicities in infants overall, during Induction I, and during Intensification II**

|                          | noGO (n = 64) |           | GO (n = 78) |           |          |
|--------------------------|---------------|-----------|-------------|-----------|----------|
| AAML03P1 + AAML0531      |               |           |             |           |          |
|                          | <i>N</i>      | %         | <i>N</i>    | %         | <i>P</i> |
| Liver VOD                | 3             | 5%        | 5           | 6%        | 0.730    |
| Ind I                    | 0             | 0%        | 2           | 3%        | 0.501    |
| Int II                   | 0             | 0%        | 0           | 0%        | 1.000    |
| LVSD                     | 8             | 13%       | 3           | 4%        | 0.055    |
| Ind I                    | 1             | 2%        | 1           | 1%        | 1.000    |
| Int II                   | 1             | 3%        | 0           | 0%        | 0.466    |
| AAML0531 only            |               |           |             |           |          |
|                          | <i>N</i>      | %         | <i>N</i>    | %         | <i>P</i> |
| Grade 3–5 infection      | 41            | 64%       | 24          | 62%       | 0.797    |
| Ind I                    | 15            | 23%       | 11          | 28%       | 0.589    |
| Int II                   | 17            | 59%       | 11          | 58%       | 0.960    |
| Sterile-site bacteria    | 36            | 56%       | 21          | 54%       | 0.812    |
| Ind I                    | 7             | 11%       | 6           | 15%       | 0.550    |
| Int II                   | 15            | 52%       | 9           | 47%       | 0.768    |
| Sterile-site fungus      | 2             | 3%        | 3           | 8%        | 0.364    |
| Ind I                    | 2             | 3%        | 2           | 5%        | 0.633    |
| Int II                   | 0             | 0%        | 0           | 0%        | 1.000    |
| AAML0531 only            |               |           |             |           |          |
|                          | Median (d)    | Range (d) | Median (d)  | Range (d) | <i>P</i> |
| ANC recovery Ind I       | 30            | 18–57     | 28          | 10–44     | 0.293    |
| ANC recovery Int II      | 33            | 10–48     | 32          | 23–47     | 0.881    |
| Platelet recovery Ind I  | 25            | 14–42     | 26          | 18–29     | 0.886    |
| Platelet recovery Int II | 27            | 11–56     | 30          | 17–40     | 0.711    |

GO indicates gemtuzumab ozogamicin; VOD, veno-occlusive disease; Ind I, Induction I; Int II, Intensification II; LVSD, left ventricular systolic dysfunction; ANC, absolute neutrophil count.
